# Supplementary material for: The Modern Ocean Sediment Archive and Inventory of Carbon (MOSAIC): version 2.0
Source: Copernicus journal article supplement (doi:10.5194/essd-2023-158), 2023-05-04
Supplement: Supplementary file [file essd-2023-158-AC2-supplement.pdf]

**a)** Databases (3)

- mosaic
  - Castes
  - Catalogs
  - Event Triggers
  - Extensions
  - Foreign Data Wrappers
  - Languages
  - Publications
  - Schemas (2)
    - mosaic 2.0
      - Collations
      - Domains
      - FTS Configurations
      - FTS Dictionaries
      - FTS Parsers
      - FTS Templates
      - Foreign Tables
      - Functions
      - Materialized Views
      - Procedures
      - 1.3 Sequences

Query Editor Query History Scratch Pad

```
1 SELECT * FROM "mosaic 2.0".geopoints
```

Data Output Explain Messages Notifications

|   | core_id<br>[PK] integer | core_name<br>character varying (75) | latitude<br>numeric (10,8) | longitude<br>numeric (11,8) | sar<br>dat |
|---|-------------------------|-------------------------------------|----------------------------|-----------------------------|------------|
| 1 | 23284                   | RMT-1 CI9113                        | 1.78000000                 | -49.03000000                | [n         |
| 2 | 23285                   | RMT-2 CI9113                        | 2.03125000                 | -48.83495146                | [n         |
| 3 | 23286                   | RMT-3 CI9113                        | 2.24000000                 | -48.58000000                | [n         |
| 4 | 23287                   | OST-1 CI9113                        | 2.77000000                 | -50.33000000                | [n         |
| 5 | 23288                   | OST-2 CI9113                        | 3.13265306                 | -50.07216495                | [n         |

**b)** MOSAIC

### MOSAIC - Modern Ocean Sediment Archive and Inventory of Carbon

Plotting MOSAIC v.1.0

Plotting MOSAIC v.2.0

Plotting data

X Variable: longitude

Y Variable: latitude

Colour Variable: Total\_Organic\_Carbon\_perc

Download data

Selected dataset (currently disabled)

Download table

Global MOSAIC v.1.0 Dataset

Download all

Global MOSAIC v.2.0 Dataset (coming soon!)

Download all

Contribute data

Download template

Upload file

Browse... No file selected

Quality check your data

Show 10 entries

Search:

MOSAIC v.1.0

latitude longitude Water\_depth\_m Sample\_depth\_average\_cm Total\_Organic\_Carbon\_perc Organic\_Nitrogen\_perc Total\_Nitrogen\_perc C\_N\_Ratio CaCO3\_perc SiO2\_perc d13C Fr

No data available in table

Showing 0 to 0 of 0 entries

Previous Next

Show 10 entries

Search:

MOSAIC v.2.0

latitude longitude Water\_depth\_m Sample\_depth\_average\_cm Total\_Organic\_Carbon\_perc Organic\_nitrogen\_perc Total\_Nitrogen\_perc C\_N\_Ratio CaCO3\_perc SiO2\_perc d13C Fr

No data available in table

Showing 0 to 0 of 0 entries

Previous Next

How to use this app & app version

About MOSAIC

Contribute to MOSAIC

Related projects
